# Supplementary material for: CLIJ: GPU-accelerated image processing for everyone
Source: bioRxiv or medRxiv preprint supplement (doi:10.1101/660704), 2019-08-22
Supplement: Supplementary file [file media-2.pdf]

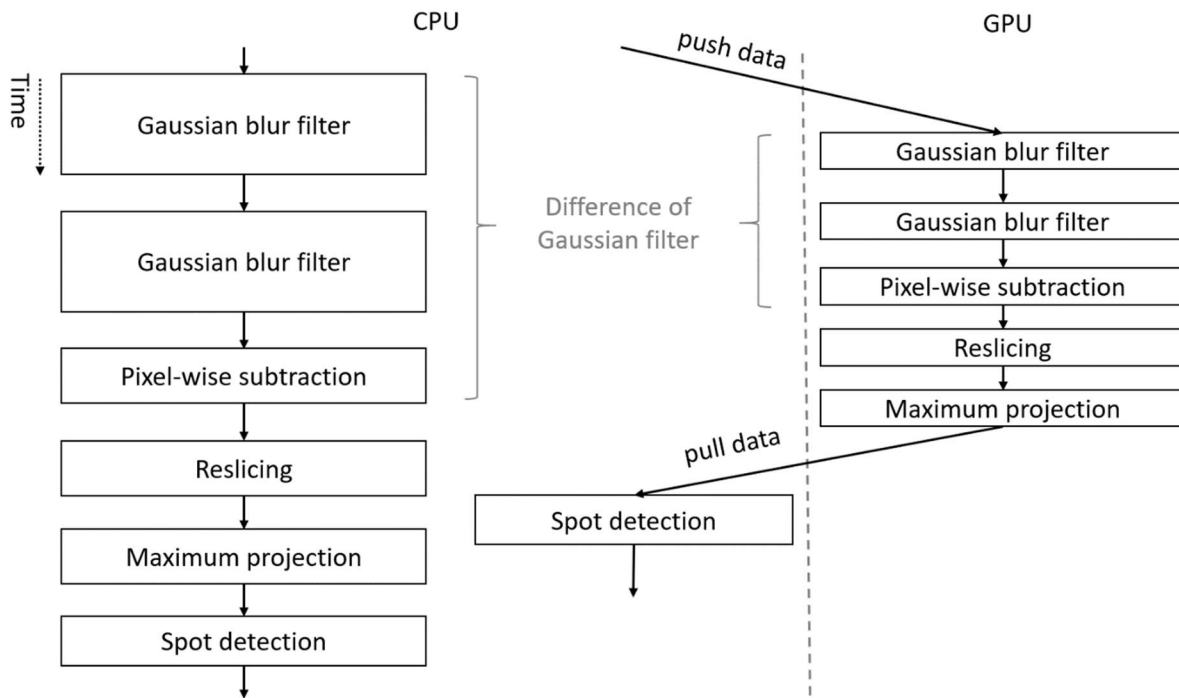

**Supplemental Figure 1:** Sequence diagram visualising that the GPU-accelerated workflow ends earlier even though data has to be pushed to GPU memory and pulled back. Difference-of-Gaussian filtering and a cylindrical maximum projection pre-process the image stack before spot detection is used to estimate nuclei count on the surface projection of a *Drosophila* embryo.
