# Supplementary material for: CLIJ: GPU-accelerated image processing for everyone
Source: bioRxiv or medRxiv preprint supplement (doi:10.1101/660704), 2019-08-22
Supplement: Supplementary file [file media-6.pdf]

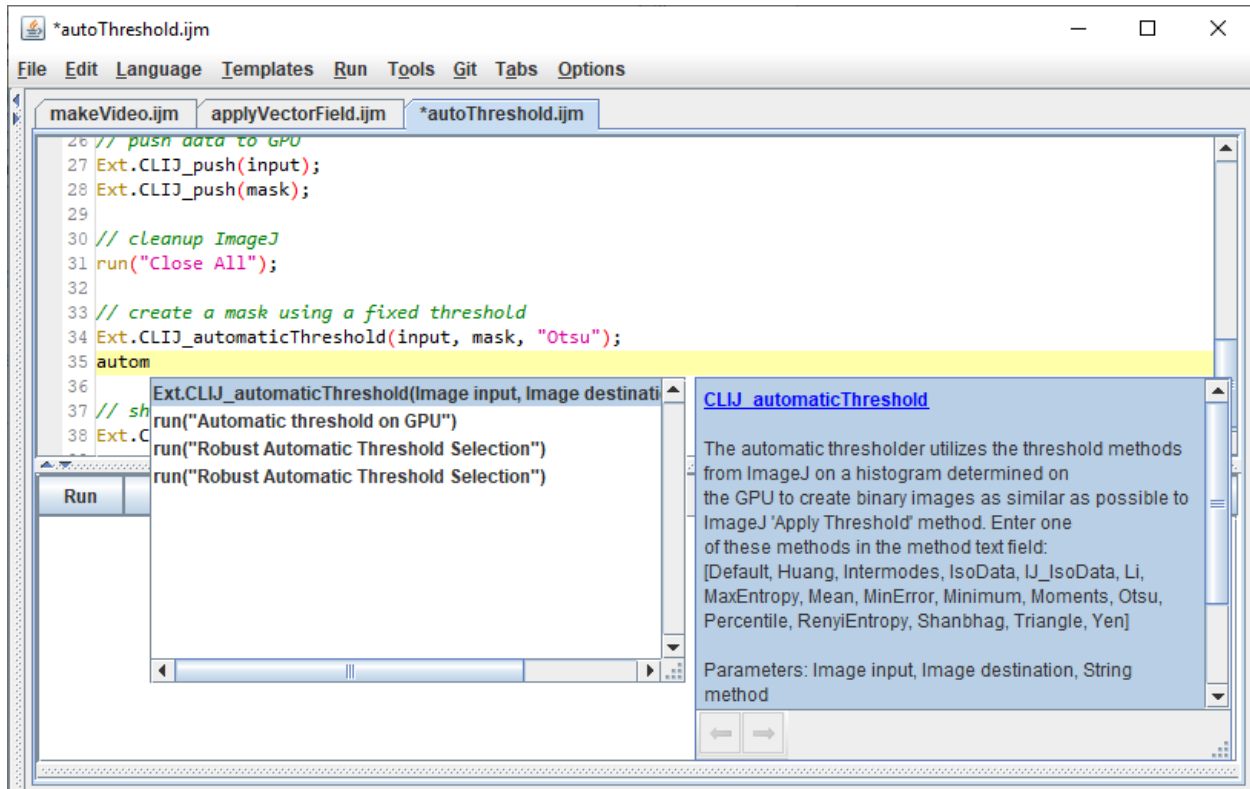

**Supplementary Figure 3:** Fijis script editor has been enriched with CLIJ specific auto-completion and online-help enabling users to assemble GPU-accelerated workflows without the need for reading the full documentation of CLIJ.
